# Supplementary material for: Resistance versus Balance Training to Improve Postural Control in Parkinson's Disease: A Randomized Rater Blinded Controlled Study
Source: PubMed Central journal article supplement (PMC4621054; doi:10.1371/journal.pone.0140584), 2015-10-26
Supplement: pone.0140584.s001.pdf [file pone.0140584.s001.pdf]

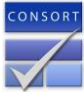

# CONSORT 2010 checklist of information to include when reporting a randomised trial\*

| Section/Topic                    | Item No | Checklist item                                                                                                                                                                              | Reported on page No          |
|----------------------------------|---------|---------------------------------------------------------------------------------------------------------------------------------------------------------------------------------------------|------------------------------|
| <b>Title and abstract</b>        |         |                                                                                                                                                                                             |                              |
|                                  | 1a      | Identification as a randomised trial in the title                                                                                                                                           | <u>YES pag 1</u>             |
|                                  | 1b      | Structured summary of trial design, methods, results, and conclusions (for specific guidance see CONSORT for abstracts)                                                                     | <u>YES pag 2</u>             |
| <b>Introduction</b>              |         |                                                                                                                                                                                             |                              |
| Background and objectives        | 2a      | Scientific background and explanation of rationale                                                                                                                                          | <u>YES pag 4-5</u>           |
|                                  | 2b      | Specific objectives or hypotheses                                                                                                                                                           | <u>YES pag 4-5</u>           |
| <b>Methods</b>                   |         |                                                                                                                                                                                             |                              |
| Trial design                     | 3a      | Description of trial design (such as parallel, factorial) including allocation ratio                                                                                                        | <u>YES pag 5</u>             |
|                                  | 3b      | Important changes to methods after trial commencement (such as eligibility criteria), with reasons                                                                                          | <u>YES pag 5</u>             |
| Participants                     | 4a      | Eligibility criteria for participants                                                                                                                                                       | <u>YES pag 5</u>             |
|                                  | 4b      | Settings and locations where the data were collected                                                                                                                                        | <u>YES pag 12</u>            |
| Interventions                    | 5       | The interventions for each group with sufficient details to allow replication, including how and when they were actually administered                                                       | <u>YES pag 6-7 and S1/S2</u> |
| Outcomes                         | 6a      | Completely defined pre-specified primary and secondary outcome measures, including how and when they were assessed                                                                          | <u>YES pag 8-10</u>          |
|                                  | 6b      | Any changes to trial outcomes after the trial commenced, with reasons                                                                                                                       | <u>YES pag 5</u>             |
| Sample size                      | 7a      | How sample size was determined                                                                                                                                                              | <u>YES pag 10</u>            |
|                                  | 7b      | When applicable, explanation of any interim analyses and stopping guidelines                                                                                                                | <u>n/a</u>                   |
| <b>Randomisation:</b>            |         |                                                                                                                                                                                             |                              |
| Sequence generation              | 8a      | Method used to generate the random allocation sequence                                                                                                                                      | <u>YES pag 6</u>             |
|                                  | 8b      | Type of randomisation; details of any restriction (such as blocking and block size)                                                                                                         | <u>YES pag 6</u>             |
| Allocation concealment mechanism | 9       | Mechanism used to implement the random allocation sequence (such as sequentially numbered containers), describing any steps taken to conceal the sequence until interventions were assigned | <u>YES pag 6</u>             |
| Implementation                   | 10      | Who generated the random allocation sequence, who enrolled participants, and who assigned participants to interventions                                                                     | <u>YES pag 6</u>             |
| Blinding                         | 11a     | If done, who was blinded after assignment to interventions (for example, participants, care providers, those                                                                                | <u>YES pag 10</u>            |

|                                                      |     |                                                                                                                                                   |                  |
|------------------------------------------------------|-----|---------------------------------------------------------------------------------------------------------------------------------------------------|------------------|
|                                                      |     | assessing outcomes) and how                                                                                                                       |                  |
| Statistical methods                                  | 11b | If relevant, description of the similarity of interventions                                                                                       | YES pag 20       |
|                                                      | 12a | Statistical methods used to compare groups for primary and secondary outcomes                                                                     | YES pag 10-11    |
|                                                      | 12b | Methods for additional analyses, such as subgroup analyses and adjusted analyses                                                                  | YES pag 10-11    |
| <b>Results</b>                                       |     |                                                                                                                                                   |                  |
| Participant flow (a diagram is strongly recommended) | 13a | For each group, the numbers of participants who were randomly assigned, received intended treatment, and were analysed for the primary outcome    | YES pag 12       |
|                                                      | 13b | For each group, losses and exclusions after randomisation, together with reasons                                                                  | Yes pag 12       |
| Recruitment                                          | 14a | Dates defining the periods of recruitment and follow-up                                                                                           | YES pag 12       |
|                                                      | 14b | Why the trial ended or was stopped                                                                                                                | YES pag 10       |
| Baseline data                                        | 15  | A table showing baseline demographic and clinical characteristics for each group                                                                  | YES pag 13       |
| Numbers analysed                                     | 16  | For each group, number of participants (denominator) included in each analysis and whether the analysis was by original assigned groups           | YES pag 13-14,17 |
| Outcomes and estimation                              | 17a | For each primary and secondary outcome, results for each group, and the estimated effect size and its precision (such as 95% confidence interval) | YES pag 13,14,17 |
|                                                      | 17b | For binary outcomes, presentation of both absolute and relative effect sizes is recommended                                                       | YES pag 14       |
| Ancillary analyses                                   | 18  | Results of any other analyses performed, including subgroup analyses and adjusted analyses, distinguishing pre-specified from exploratory         | YES pag 18       |
| Harms                                                | 19  | All important harms or unintended effects in each group (for specific guidance see CONSORT for harms)                                             | YES pag 12       |
| <b>Discussion</b>                                    |     |                                                                                                                                                   |                  |
| Limitations                                          | 20  | Trial limitations, addressing sources of potential bias, imprecision, and, if relevant, multiplicity of analyses                                  | YES pag 20-21    |
| Generalisability                                     | 21  | Generalisability (external validity, applicability) of the trial findings                                                                         | YES pag 19-20    |
| Interpretation                                       | 22  | Interpretation consistent with results, balancing benefits and harms, and considering other relevant evidence                                     | YES pag 19-21    |
| <b>Other information</b>                             |     |                                                                                                                                                   |                  |
| Registration                                         | 23  | Registration number and name of trial registry                                                                                                    | YES pag 6        |
| Protocol                                             | 24  | Where the full trial protocol can be accessed, if available                                                                                       | YES pag 11       |
| Funding                                              | 25  | Sources of funding and other support (such as supply of drugs), role of funders                                                                   | YES pag 21       |

\*We strongly recommend reading this statement in conjunction with the CONSORT 2010 Explanation and Elaboration for important clarifications on all the items. If relevant, we also recommend reading CONSORT extensions for cluster randomised trials, non-inferiority and equivalence trials, non-pharmacological treatments, herbal interventions, and pragmatic trials. Additional extensions are forthcoming: for those and for up to date references relevant to this checklist, see [www.consort-statement.org](http://www.consort-statement.org).
